# Supplementary material for: Performance and clinical utility of two targeted multigene panels for GIST molecular characterization
Source: Springer Nature journal article supplement (doi:10.1038/s41598-025-30548-7), 2025-12-17
Supplement: MOESM1 [file 41598_2025_30548_MOESM1_ESM.pdf]

**Supplementary Table 1: Spectrum of *KIT* and *PDGFRA* gene alterations**

|                          | <b>N (%)</b>    |
|--------------------------|-----------------|
| <b><i>KIT</i></b>        | <b>Tot: 118</b> |
| Duplications             | 21 (17.8)       |
| SNV                      | 43 (36.4)       |
| Ins/Del                  | 54 (45.8)       |
| p.Val559Asp              | 11 (9.3)        |
| p.Ala502_Tyr503dup       | 10 (8.5)        |
| p.Trp557Arg              | 9 (7.6)         |
| p.Trp557_Lys558del       | 8 (6.8)         |
| p.Trp557_Val560delinsPhe | 5 (4.2)         |
| other Duplications       | 11 (9.3)        |
| other SNV                | 23 (19.5)       |
| other Ins/Del            | 41 (34.7)       |
| <b><i>PDGFRA</i></b>     | <b>Tot: 18</b>  |
| SNV                      | 15 (83.3)       |
| Ins/Del                  | 3 (16.6)        |
| p.Asp842Val              | 10 (55.5)       |
| other SNV                | 5 (27.7)        |

SNV: Single Nucleotide Variant; Ins/Del: Insertion/Deletion.
